# Supplementary material for: Trends in atmospheric ammonia at urban, rural and remote sites across North America
Source: Copernicus journal article supplement (doi:10.5194/acp-2016-259), 2016-05-23

Fig S1. Exponential correlations between atmospheric NH<sub>3</sub> and ambient T at six Canadian sites

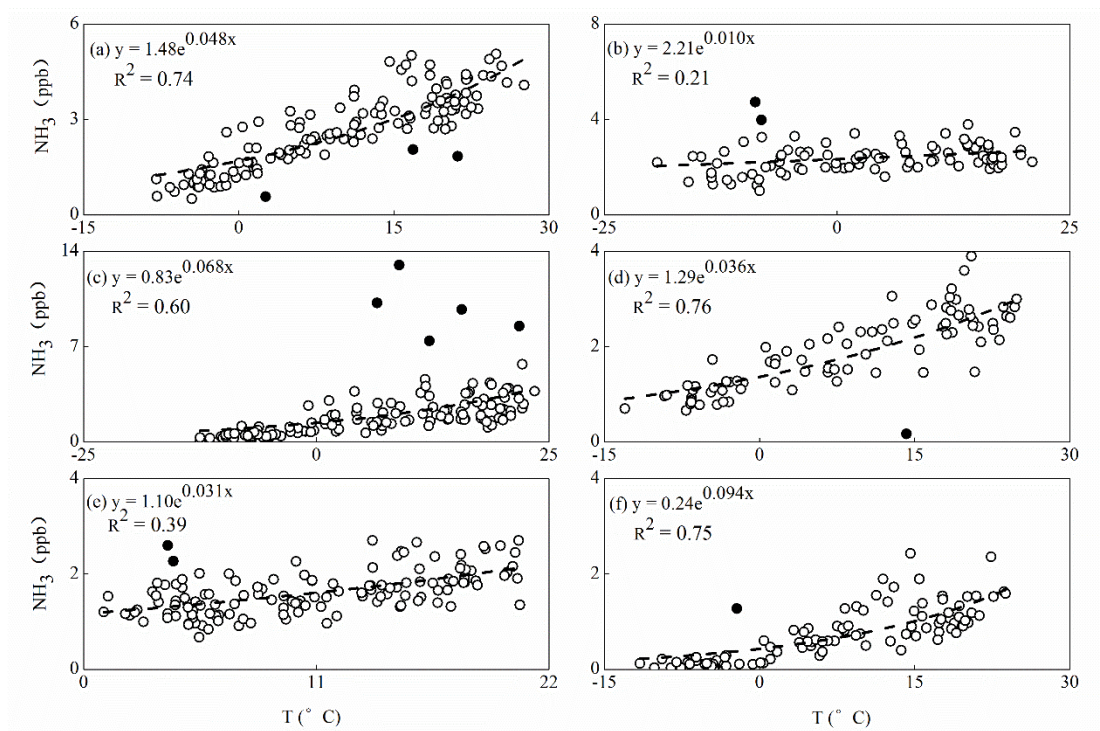

Fig S2. Exponential correlations between atmospheric NH<sub>3</sub> and ambient T at eight U.S. sites

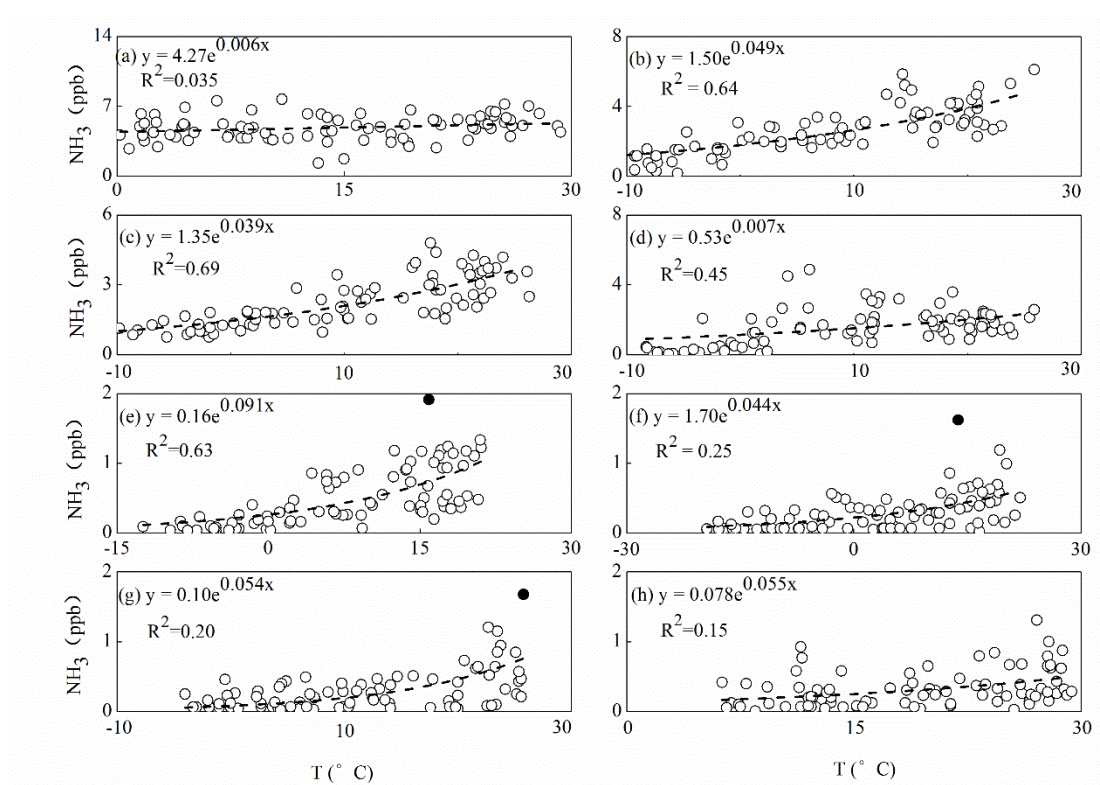

Fig. S3 Annual emissions of atmospheric NH<sub>3</sub> in three provinces of Canada (a: Ontario; B: Quebec; c: British Columba).

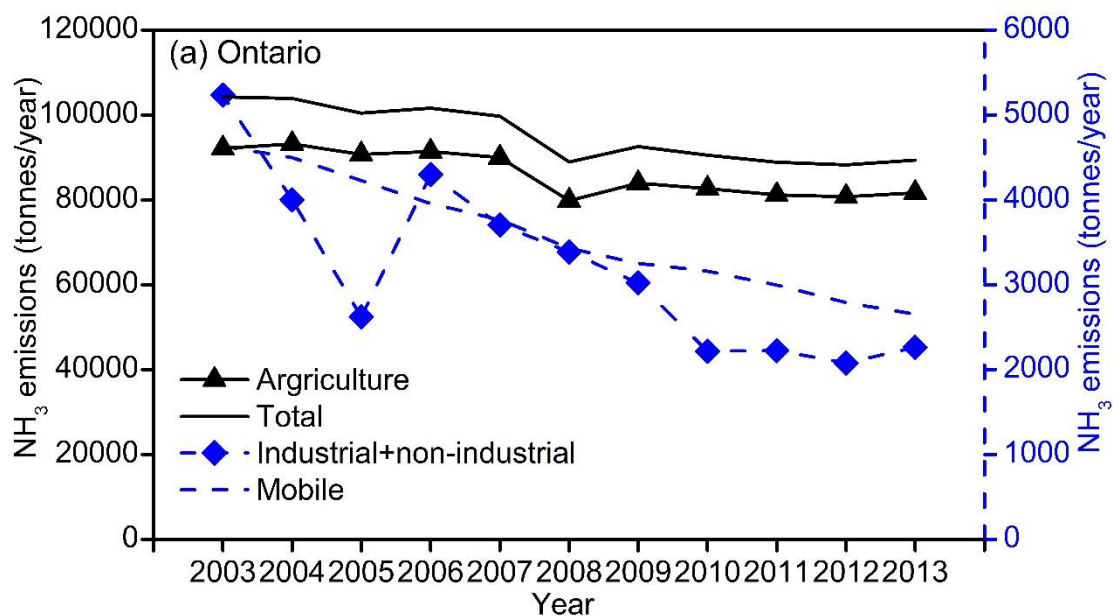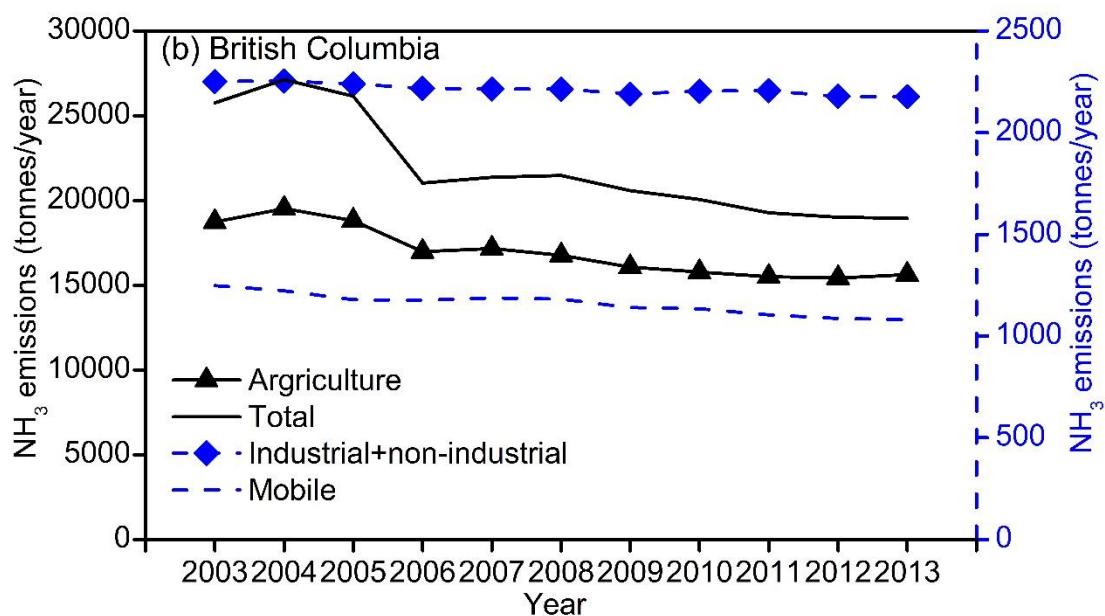

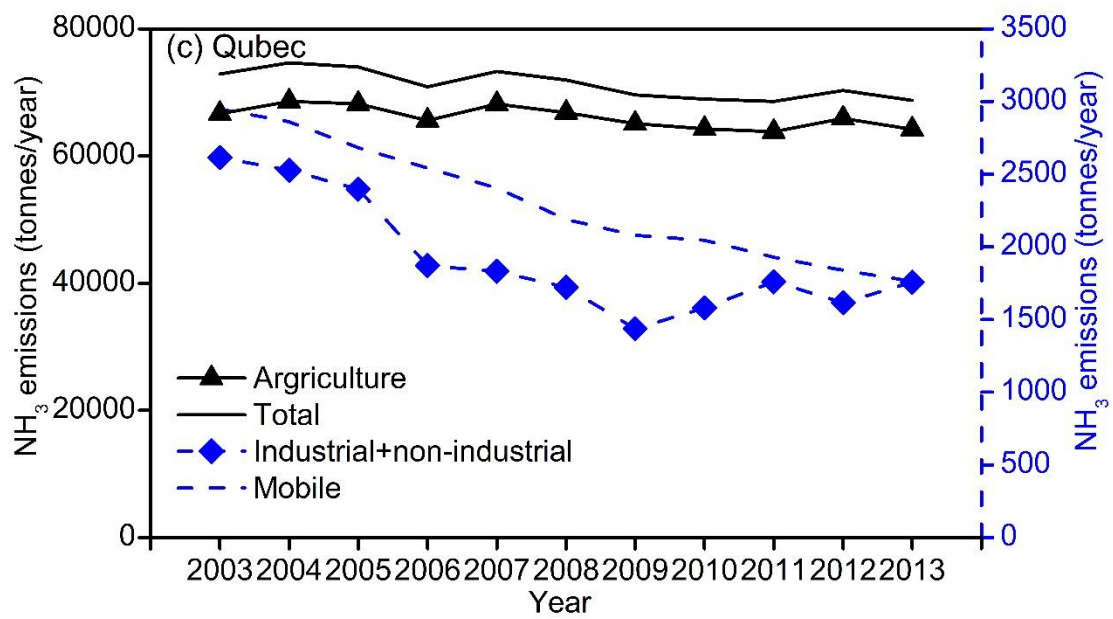

Fig. S4 The spectra of input data, IMFs and residual calculated by EEMD for atmospheric NH<sub>3</sub> at Site 1 from July 2003 to June 2014.

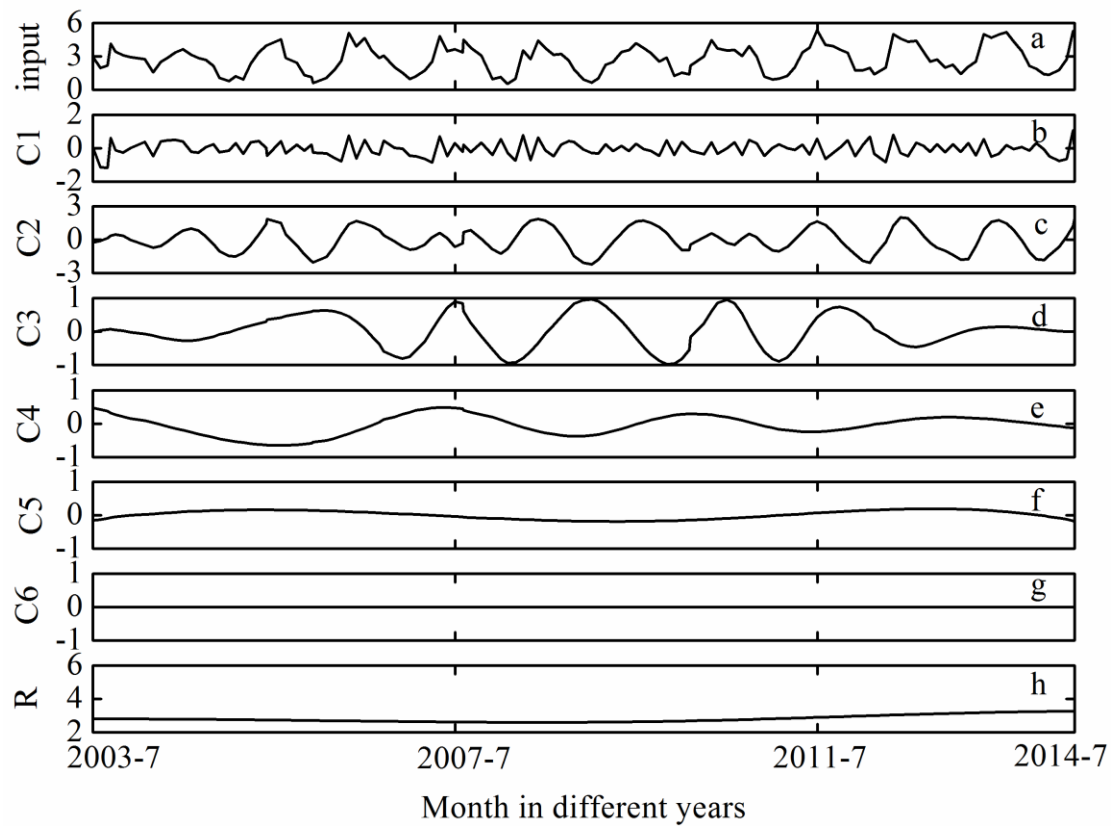

Fig. S5 The spectra of input data, IMFs and residual calculated by EEMD for  $\text{pNH}_4^+$  in  $\text{PM}_{2.5}$  at Site 1 from July 2003 to June 2014.

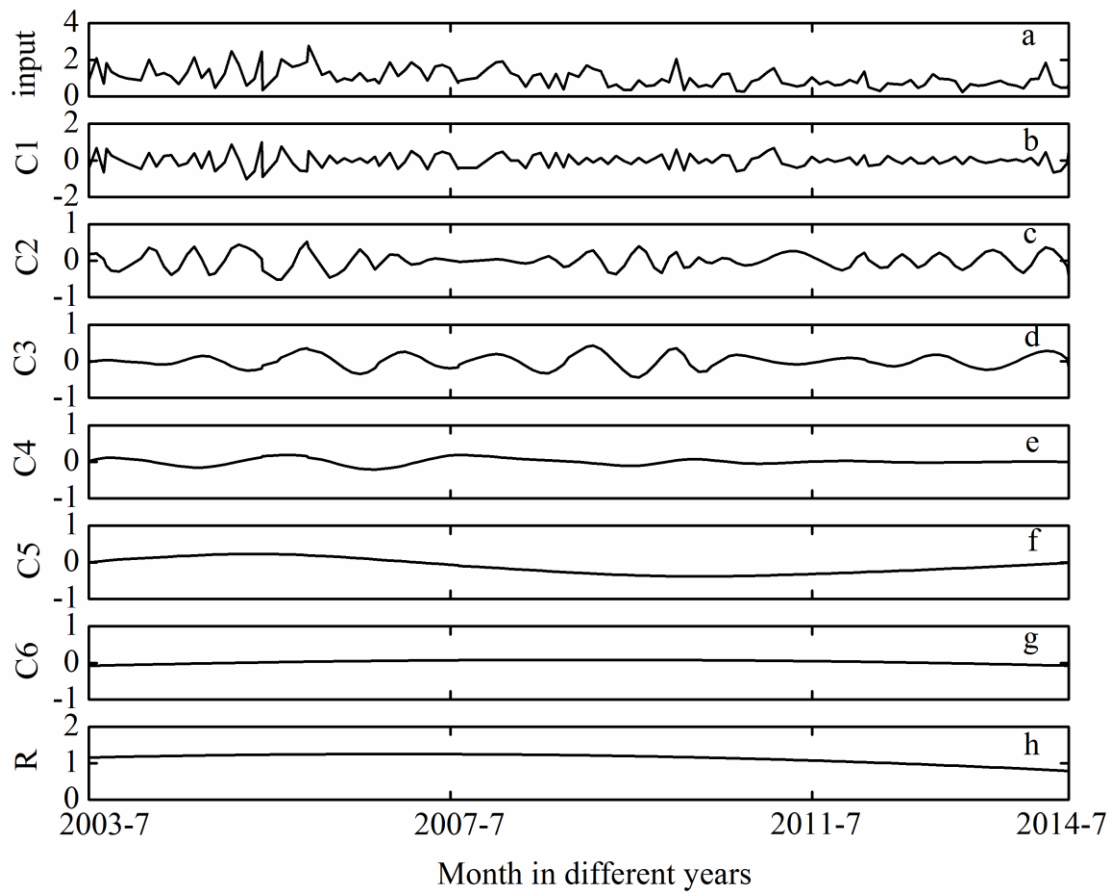

Supplement: Supplementary file 1 [file acp-2016-259-supplement.pdf]
