# Supplementary material for: Trends in atmospheric ammonia at urban, rural and remote sites across North America
Source: Copernicus journal article supplement (doi:10.5194/acp-2016-259), 2016-05-23
Supplement: Supplementary file [file acp-2016-259-RC2-supplement.pdf]

**Title:** Trends in atmospheric ammonia at urban, rural and remote sites across North America

**Journal:** Atmospheric Chemistry and Physics

**Manuscript Number:** acp-2016-259-manuscript-version2

**Comments:**

This is an interesting paper, in which the authors attempted to compile a large set of measurement data of gaseous ammonia and particulate ammonium at fourteen sites including four urban sites, four remote sites and six rural/agriculture sites distributed at different latitudes in USA and Canada. The authors used two statistical trend analysis techniques to examine trends in atmospheric levels of ammonia over time. The analysis on the role of temperature on ammonia levels is also addressed in this work. Overall, this is a good work that will be beneficial to the global scientific community to get the insights into the trends of atmospheric levels of ammonia. However, the article needs to address some minor issues as per the specific comments given in this report i.e. minor revisions are needed before this paper can be accepted for publication.

- In the manuscript, it was found that strong scientific inferences are stated without support of proper literature citation. E.g., L206-209, L209-211. The authors are requested to fix these kind of issues throughout the manuscript.
- At several places of the manuscript, it is mentioned in a bracket that figure not shown. It would be better to remove such words.
- L303-305: The analysis of data with proper interpretation should be done to support such statement.
